# Supplementary material
Source: PubMed Central journal article supplement (PMC2276368)
Supplement: jbc_M707174200_1.pdf [file jbc_M707174200_1.pdf]

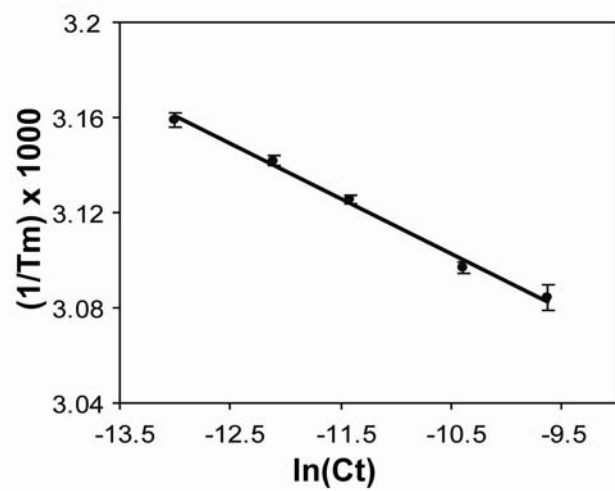

Fig S1:  $1/T_M$  vs  $\ln(Ct)$  plot of 12mer U: G oligonucleotide

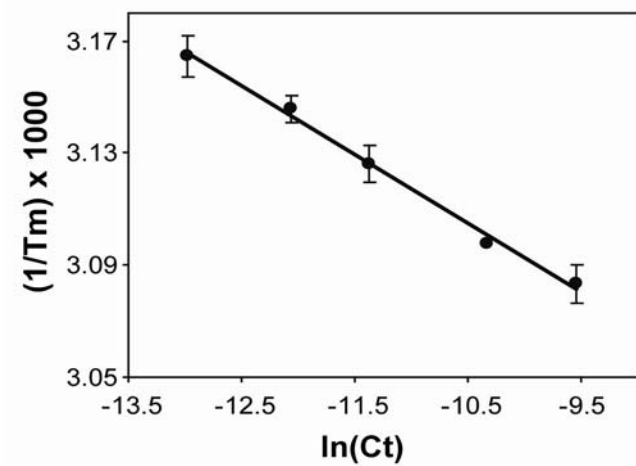

Fig S2:  $1/T_M$  vs  $\ln(C_t)$  plot of 12mer U: HX oligonucleotide

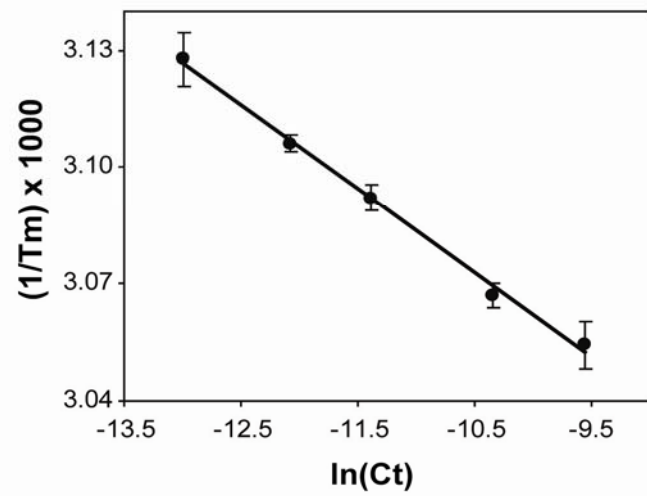

Fig S3:  $1/T_M$  vs  $\ln(Ct)$  plot of 12mer U: Pu oligonucleotide

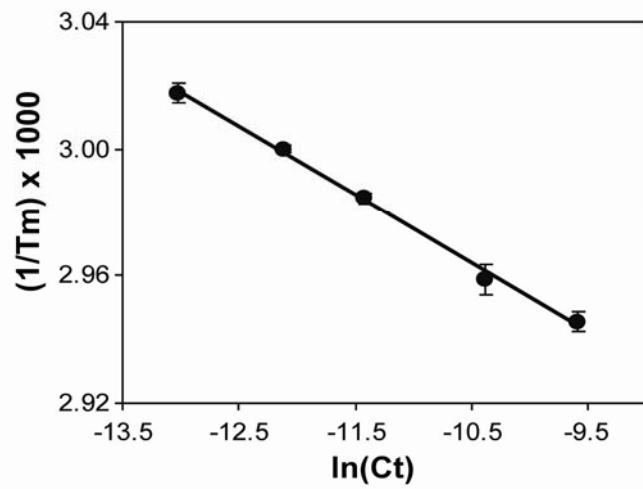

Fig S4:  $1/T_M$  vs  $\ln(C_t)$  plot of 12mer U: A oligonucleotide

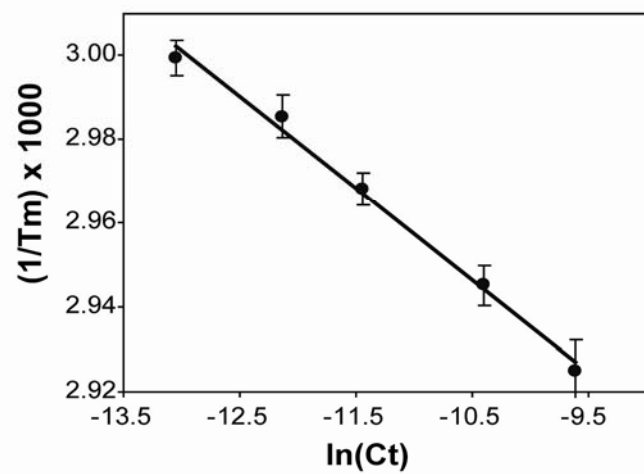

Fig S5:  $1/T_M$  vs  $\ln(C_t)$  plot of 12mer U: 2AA oligonucleotide

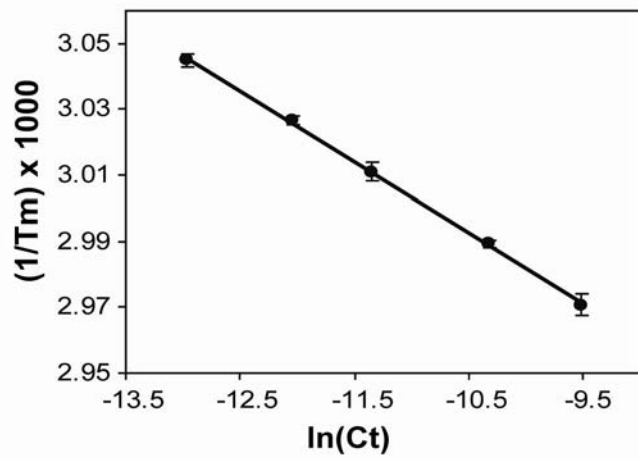

Fig S6:  $1/T_M$  vs  $\ln(Ct)$  plot of 12mer U: 2AP oligonucleotide

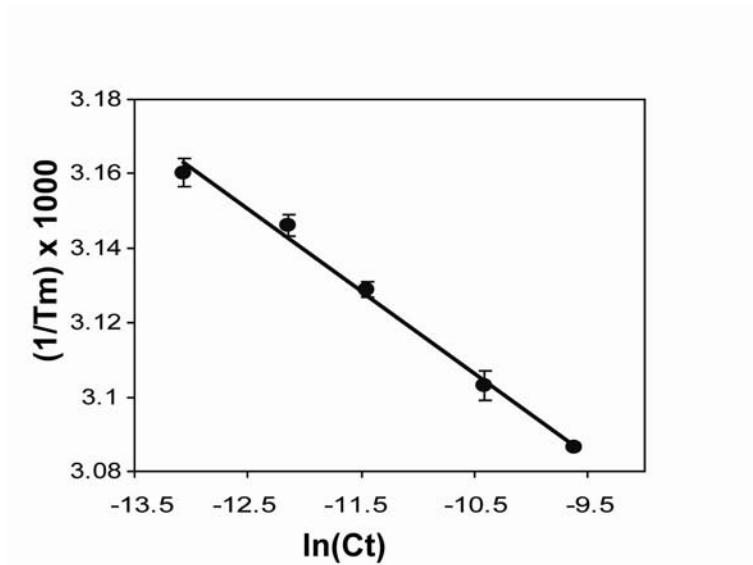

Fig S7:  $1/T_M$  vs  $\ln(Ct)$  plot of 12mer FU:G oligonucleotide

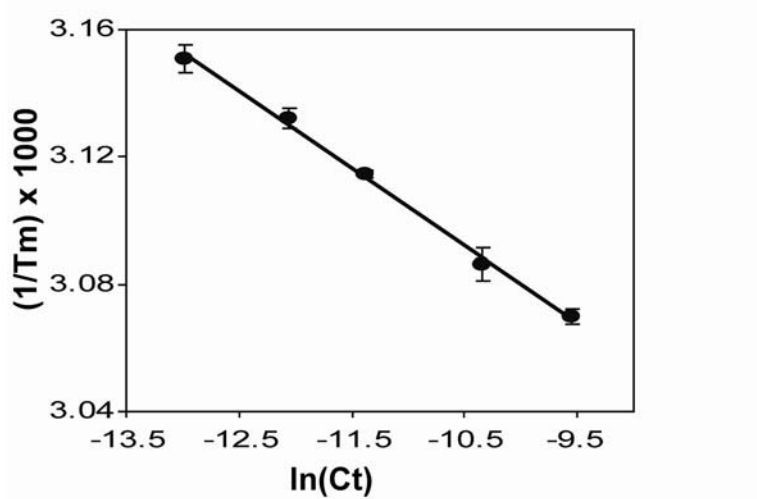

Fig S8:  $1/T_M$  vs  $\ln(Ct)$  plot of 12mer CIU:G oligonucleotide



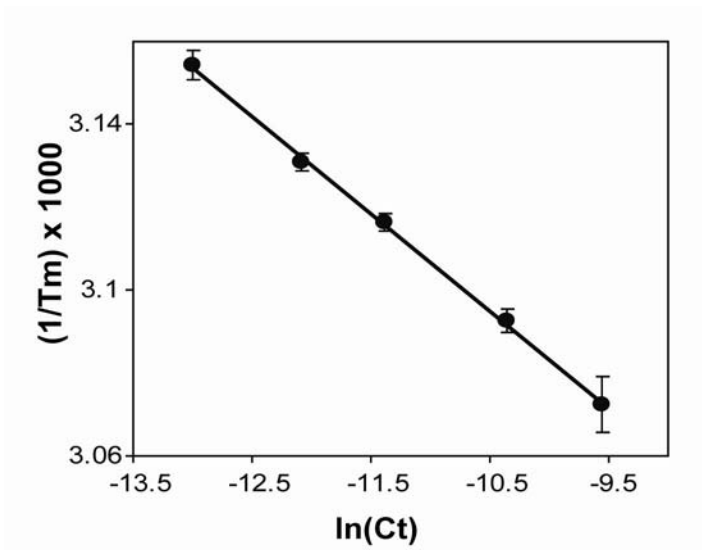

Fig S9:  $1/T_M$  vs  $\ln(Ct)$  plot of 12mer BrU:G oligonucleotide

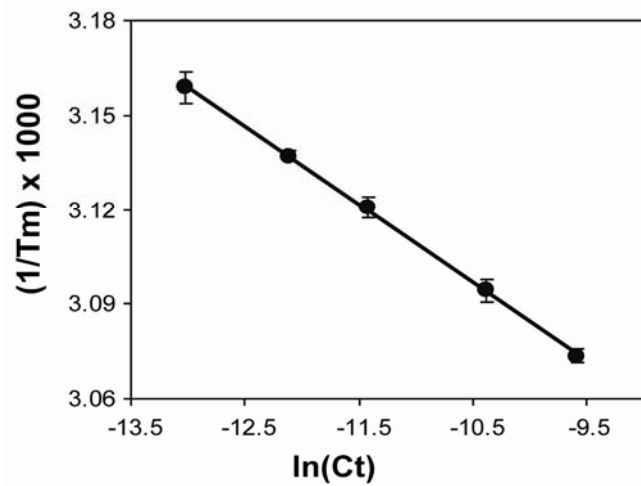

Fig S10:  $1/T_M$  vs  $\ln(Ct)$  plot of 12mer IU:G oligonucleotide

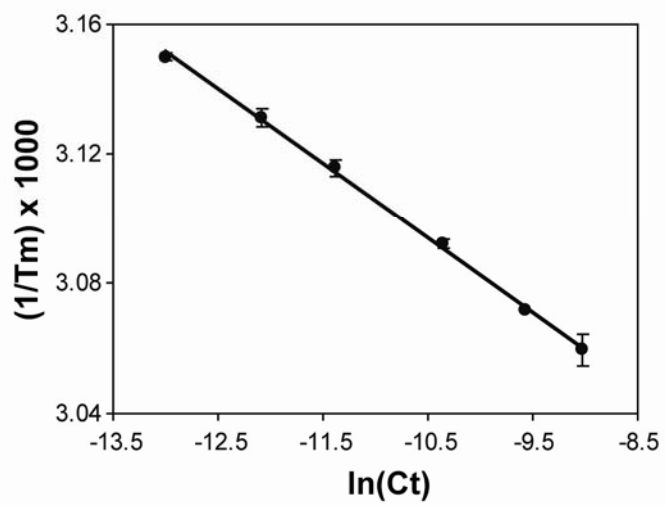

Fig S11:  $1/T_M$  vs  $\ln(C_t)$  plot of 12mer T:G oligonucleotide
